# Supplementary material for: Novel prokaryotic sensing and regulatory system employing previously unknown nucleic acids-based receptors
Source: bioRxiv or medRxiv preprint supplement (doi:10.1101/2021.09.11.459467), 2021-11-08
Supplement: Supplementary file [file media-1.pdf]

Tetz V. Tetz G. Novel prokaryotic sensing and regulatory system employing previously unknown nucleic acids-based receptors.

Supplementary Figure S1. Absence of RNase A internalization in *B. pumilus*.

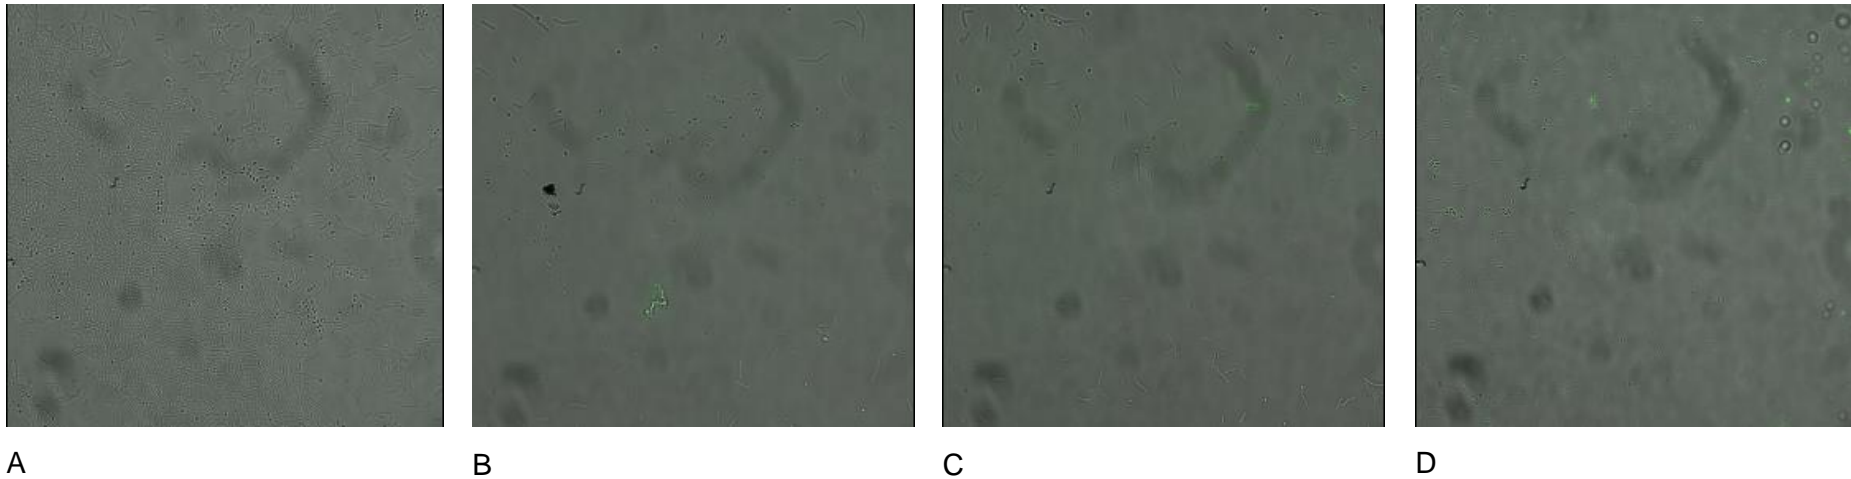

*B. pumilus* cells were (A) untreated control (B) treated with fluorophore-labeled RNase A (100 µg/mL) for 15 min (C) treated with fluorophore-labeled RNase A (100 µg/mL) for 60 min (D) cultivated for 24h on agar supplemented with fluorophore-labeled RNase A (100 µg/mL) for 24h supplemented with labeled RNase A (100 µg/mL).
