# Supplementary material for: Novel prokaryotic sensing and regulatory system employing previously unknown nucleic acids-based receptors
Source: bioRxiv or medRxiv preprint supplement (doi:10.1101/2021.09.11.459467), 2021-11-08

Tetz V. Tetz G. Novel prokaryotic sensing and regulatory system employing previously unknown nucleic acids-based receptors.

Supplementary Figure 2. Effect of TezRs removal on light sensing.

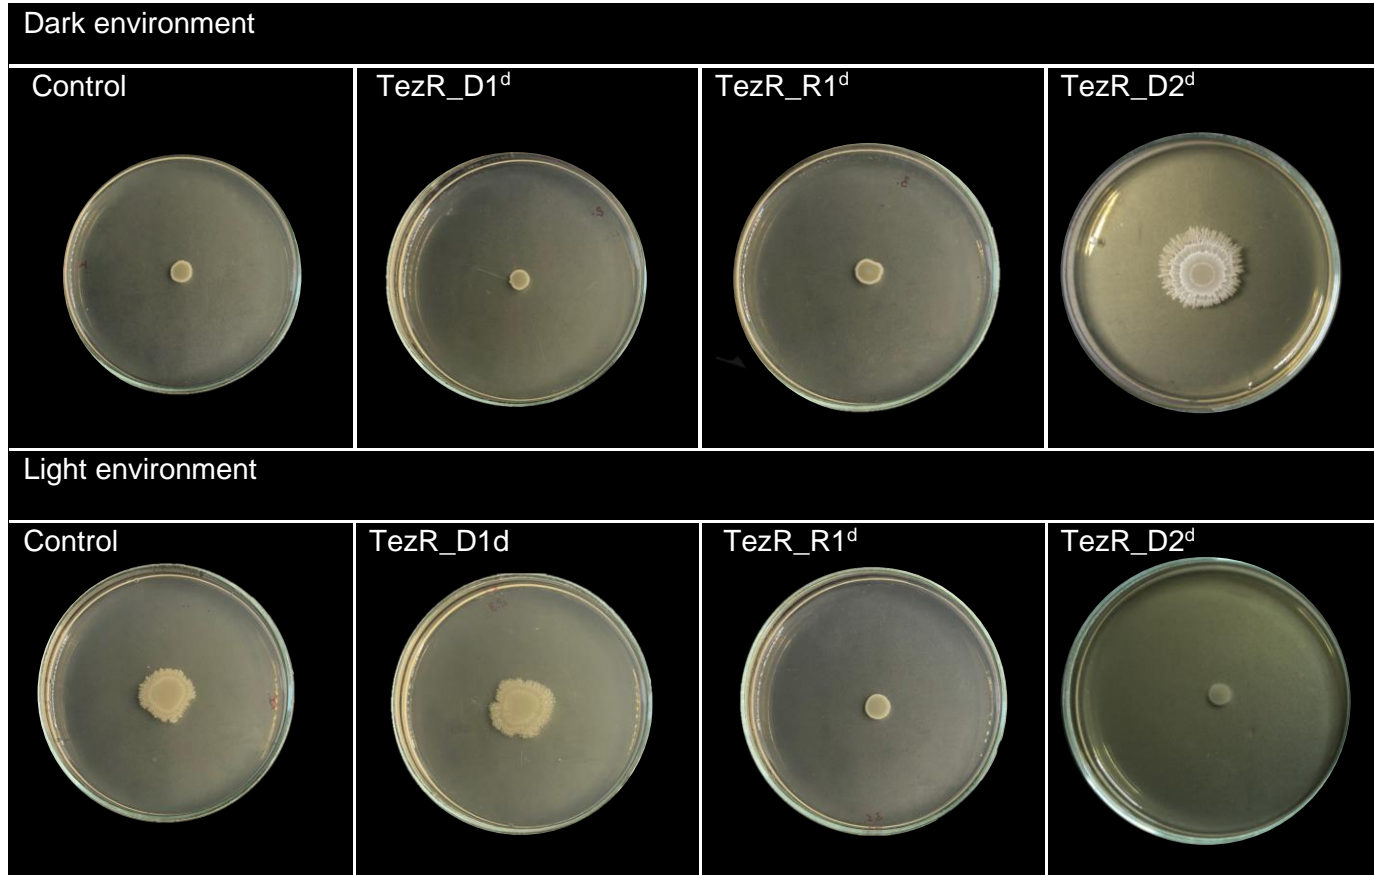

Supplement: Supplementary file [file media-2.pdf]
